# Supplementary material for: Impact of self-efficacy and burnout on professional development of physical education teachers in the digital age: a systematic review
Source: PeerJ. 2025 Feb 21;13:e18952. doi: 10.7717/peerj.18952 (PMC11849512; doi:10.7717/peerj.18952)
Supplement: Supplemental Information 1 — The data primarily includes methodological quality assessment and literature data extraction. [file peerj-13-18952-s001.xlsx]

## Sheet: 数据填充
Article number	Items	Introduction	Methods										Results					Discussion		Other		Results
	Author(s) year of publication	Q1	Q2	Q3	Q4	Q5	Q6	Q7	Q8	Q9	Q10	Q11	Q12	Q13	Q14	Q15	Q16	Q17	Q18	Q19	Q20	Yes	No	Don't know/comment	score
		1 Were the aims/objectives of the study clear?	2 Was the study design appropriate for the stated aim(s)?	3 Was the sample size justified?	4 Was the target/reference population clearly defined? (Is it clear who the research was about?)	5 Was the sample frame taken from an appropriate population base so that it closely represented the target/reference population under investigation?	6 Was the selection process likely to select subjects/participants that were representative of the target/reference population under investigation?	7 Were measures undertaken to address and categorise non-responders?	8 Were the risk factor and outcome variables measured appropriate to the aims of the study?	9 Were the risk factor and outcome variables measured correctly using instruments/measurements that had been trialled, piloted or published previously?	10 Is it clear what was used to determined statistical significance and/or precision estimates? (eg, p values, CIs)	11 Were the methods (including statistical methods) sufficiently described to enable them to be repeated?	12 Were the basic data adequately described?	13 Does the response rate raise concerns about non-response bias?	14 If appropriate, was information about non-responders described?	15 Were the results internally consistent?	16 Were the results for the analyses described in the methods, presented?	17 Were the authors’ discussions and conclusions justified by the results?	18 Were the limitations of the study discussed?	19 Were there any funding sources or conflicts of interest that may affect the authors’interpretation of the results?	20 Was ethical approval or consent of participants attained?
1	Ben Amotz et al.2022 (12)	Y	Y	Y	Y	Y	Y	Y	Y	Y	Y	Y	Y	UC	N	Y	Y	Y	Y	Y	Y	18	1	1	0.925
2	Gobbi, E. et al.2021 (13)	Y	Y	Y	Y	Y	Y	Y	Y	Y	Y	Y	Y	N	N	Y	Y	Y	Y	Y	Y	18	2	0	0.9
3	Kalemoǧlu. 2014 (2)	Y	Y	Y	Y	Y	Y	N	Y	Y	Y	UC	Y	N	N	Y	Y	Y	N	N	N	13	6	1	0.675
4	Koh, Koon Teck. et al.2022 (1)	Y	Y	Y	Y	Y	Y	Y	Y	Y	Y	Y	Y	N	N	Y	Y	Y	Y	Y	Y	18	2	0	0.9
5	Kwon, E. H. et al. 2017(0)	Y	Y	Y	Y	Y	Y	Y	Y	Y	Y	Y	Y	N	N	Y	Y	Y	N	N	Y	16	4	0	0.8
6	Maltagliati et al. 2021(0)	Y	Y	Y	Y	Y	Y	N	Y	Y	Y	Y	Y	N	N	Y	Y	Y	Y	N	Y	16	4	0	0.8
7	Nguyễn, Hoàng Minh Thuận et al.2022(0)	Y	Y	Y	Y	Y	Y	N	Y	Y	Y	Y	Y	N	N	Y	Y	Y	Y	Y	Y	17	3	0	0.85
8	Şahin, Tolga 2021(2)	Y	Y	Y	Y	Y	N	N	Y	Y	Y	Y	Y	N	N	Y	Y	Y	Y	N	Y	15	5	0	0.75
9	ŞİRİN, Tayfun et al. 2022 (1)	Y	Y	Y	Y	Y	Y	N	Y	Y	Y	Y	Y	N	N	Y	Y	Y	N	Y	N	15	5	0	0.75
10	Werner, Danielle.2020 (0)	Y	Y	Y	Y	Y	Y	Y	Y	Y	Y	Y	Y	N	Y	Y	Y	Y	Y	N	N	17	3	0	0.85

## Sheet: Sheet2
Article number	1	2	3	4	5	6	7	8	9	10
Author(s) year of publication	Ben Amotz et al.2022 (12)	Gobbi, E. et al.2021 (13)	Kalemoǧlu. 2014 (2)	Koh, Koon Teck. et al.2022 (1)	Kwon, E. H. et al. 2017(0)	Maltagliati et al. 2021(0)	Nguyễn, Hoàng Minh Thuận et al.2022(0)	Şahin, Tolga 2021(2)	ŞİRİN, Tayfun et al. 2022 (1)	Werner, Danielle.2020 (0)
Introduction
Q1	Y	Y	Y	Y	Y	Y	Y	Y	Y	Y
Methods
Q2	Y	Y	Y	Y	Y	Y	Y	Y	Y	Y
Q3	Y	Y	Y	Y	Y	Y	Y	Y	Y	Y
Q4	Y	Y	Y	Y	Y	Y	Y	Y	Y	Y
Q5	Y	Y	Y	Y	Y	Y	Y	Y	Y	Y
Q6	Y	Y	Y	Y	Y	Y	Y	N	Y	Y
Q7	Y	Y	N	Y	Y	N	N	N	N	Y
Q8	Y	Y	Y	Y	Y	Y	Y	Y	Y	Y
Q9	Y	Y	Y	Y	Y	Y	Y	Y	Y	Y
Q10	Y	Y	Y	Y	Y	Y	Y	Y	Y	Y
Q11	Y	Y	UC	Y	Y	Y	Y	Y	Y	Y
Results
Q12	Y	Y	Y	Y	Y	Y	Y	Y	Y	Y
Q13	UC	N	N	N	N	N	N	N	N	N
Q14	N	N	N	N	N	N	N	N	N	Y
Q15	Y	Y	Y	Y	Y	Y	Y	Y	Y	Y
Q16	Y	Y	Y	Y	Y	Y	Y	Y	Y	Y
Discussion
Q17	Y	Y	Y	Y	Y	Y	Y	Y	Y	Y
Q18	Y	Y	N	Y	N	Y	Y	Y	N	Y
Other
Q19	Y	Y	N	Y	N	N	Y	N	Y	N
Q20	Y	Y	N	Y	Y	Y	Y	Y	N	N
Results	18	18	13	18	16	16	17	15	15	17
	1	2	6	2	4	4	3	5	5	3
	1	0	1	0	0	0	0	0	0	0
	0.925	0.9	0.675	0.9	0.8	0.8	0.85	0.75	0.75	0.85

## Sheet: Sheet1
Introduction
Q1	1 Were the aims/objectives of the study clear?
Methods
Q2	2 Was the study design appropriate for the stated aim(s)?
Q3	3 Was the sample size justified?
Q4	4 Was the target/reference population clearly defined? (Is it clear who the research was about?)
Q5	5 Was the sample frame taken from an appropriate population base so that it closely represented the target/reference population under investigation?
Q6	6 Was the selection process likely to select subjects/participants that were representative of the target/reference population under investigation?
Q7	7 Were measures undertaken to address and categorise non-responders?
Q8	8 Were the risk factor and outcome variables measured appropriate to the aims of the study?
Q9	9 Were the risk factor and outcome variables measured correctly using instruments/measurements that had been trialled, piloted or published previously?
Q10	10 Is it clear what was used to determined statistical significance and/or precision estimates? (eg, p values, CIs)
Q11	11 Were the methods (including statistical methods) sufficiently described to enable them to be repeated?
Results
Q12	12 Were the basic data adequately described?
Q13	13 Does the response rate raise concerns about non-response bias?
Q14	14 If appropriate, was information about non-responders described?
Q15	15 Were the results internally consistent?
Q16	16 Were the results for the analyses described in the methods, presented?
Discussion
Q17	17 Were the authors’ discussions and conclusions justified by the results?
Q18	18 Were the limitations of the study discussed?
Other
Q19	19 Were there any funding sources or conflicts of interest that may affect the authors’interpretation of the results?
Q20	20 Was ethical approval or consent of participants attained?
Results
Yes	1
No	0
Don't know/comment	0.5
score	excellent ≥70%， medium 50-69%， low <50%

## Sheet: 数据提取
author	year	country	sample size	type of education	Digitalization tools	methodology	field of research	Key findings	Discussion
Ben Amotz et al.	2022	Israeli	757	K12	remote teaching	QT (SE, Resilience, Subjective wellbeing)	SE,	Higher competence and effectiveness of female teachers in distance learning	Increased training for PD
							stress/health perception levels.
Gobbi, E. et al.	2021	Italy	622	primary	Online teaching	QT (SE, PDC)	SE,	1.Low digital competence and reduced SE. 2.SE is related to work engagement.	Improve digital PD training opportunities.
							work engagement,
							Digital PD ability.
Kalemoǧlu.	2014	Turkey	377	University	computer technology	QT (Technology Attitude， Computer SE Belief)	computer SE beliefs, Attitude PD	Male teachers had higher computer skills and self-beliefs than female teachers.	SE beliefs increase the more computer-based educational technology is used.
Koh, Koon Teck. et al.	2022	Singapore	11	K12, University	ICT, flipped learning, guided discovery;	QL (semi-structured interview)	SE(ICT),	SE is influenced by ICT capabilities.	The education sector provides PD opportunities that increase teachers' confidence in "integrating ICT PE skills".
Kwon, E. H. et al.	2017	Korea	74	University	e-learning	RCT (APE plan)	SE	Improved SE of pre-service teachers.	Increase PD opportunities and develop online resources.
Maltagliati et al. 2021	2021	Italy	1931	/	Digital technology (live Visio-conferences or video tutorials)	QT (Intention to promote PA, Behaviors promoting PA, SDM, SE, Engagement)	SE, autonomous, controlled motivation, PUTDT, DA, PA, pressures	1.SE was positively correlated with PUTDT, followed by motivation, control, and PA-promoting intentions;	Suggested that further research could be done through teachers' emotional relationships (stress, depression).
		France						2.finally changes in SE, PUTDT, and PA-promoting intentions were related to changes in PA-promoting behaviors.
Nguyễn, Hoàng Minh Thuận et al.	2022	Vietnam	60	personal gym trainers	blended learning, fully online courses	M (burnout questionnaire, Focus-Group Interview)	digital SE, burnout,	1.Burnout levels tended to increase in fully online instruction.	Increased PD opportunities for coaches, teachers and digital competence.
								2.it trended downward in blended instruction (environmental factor: period of epidemic).
								3.Burnout increased and self-achievement decreased.
Şahin, Tolga	2021	Turkey	172	/	distance education	QT (Teacher Effectiveness)	digital SE, teaching technology	learning environment, application of PE content, teaching strategies, and total score parameters were lower.	Support for future directions in research PD.
ŞİRİN, Tayfun et al.	2022	Turkey	504	high, secondary	Digital	QT (DB, PF)	perceptual Fatigue, burnout	moderate PF and DB.	Tuning in to PF and adapting to the digital environment.
Werner, Danielle.	2020	USA	57	K12	Computer Technology	QT (CTISPE)	SE, PD	1.PD increased computer SE.	PD using SE theory in conjunction with new technology.
								2.No significant difference with age, teaching experience.
注意： QT是Quantitative，QL是 Qualitative，M是 Mix method, SE是self-efficacy，PD是professional development， PDC是perceived digital competence， ICT是 Information and communications technology，PUTDT是perceived usefulness toward digital technologies， DA是 decreased Amotivation， SDM是Self-determined motivation， CTIS是 Computer Technology Integration Survey for Physical Education， DB是 digital burnout， PF是 perceptual f…
			4565
			4508
